# Supplementary material for: Human BDNF/TrkB variants impair hippocampal synaptogenesis and associate with neurobehavioural abnormalities
Source: PubMed Central journal article supplement (PMC7270116; doi:10.1038/s41598-020-65531-x), 2020-06-03

**A**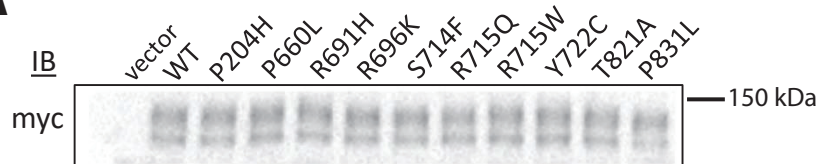**B**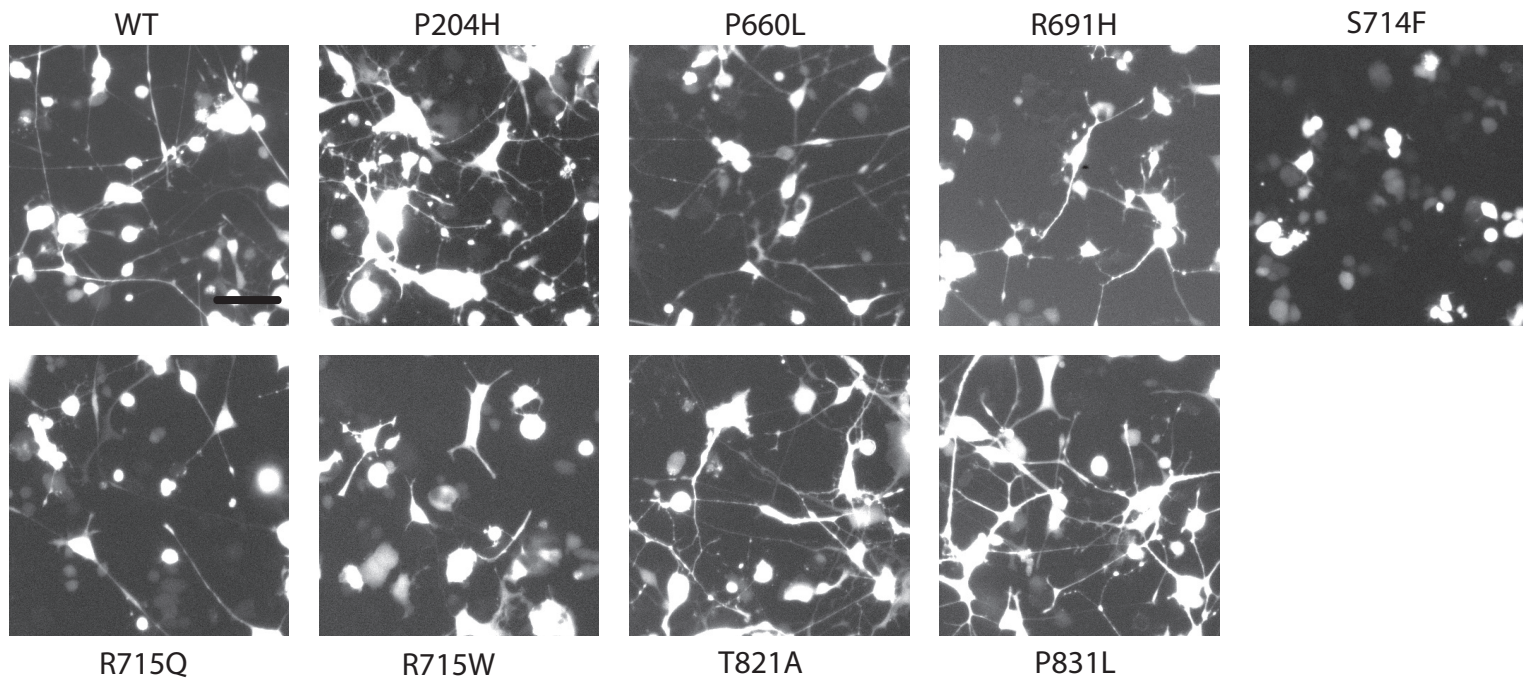**C**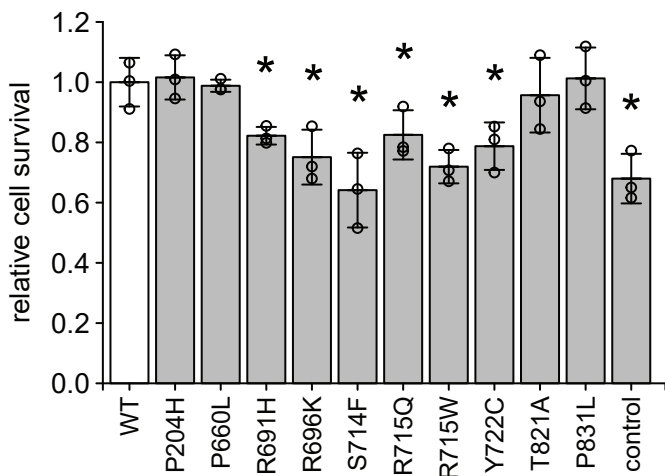

Supplement: 41598_2020_65531_MOESM4_ESM.pdf [file 41598_2020_65531_MOESM4_ESM.pdf]
